# Supplementary material for: A regulatory RNA is involved in RNA duplex formation and biofilm regulation in Sulfolobus acidocaldarius
Source: PubMed Central journal article supplement — Nucleic Acids Res. 2018 Feb 26;46(9):4794–806. doi: 10.1093/nar/gky144 (PMC5961385; doi:10.1093/nar/gky144), 2018-02-26
Supplement: gky144_supp.pdf [file gky144_supp.pdf]

## Supplemental tables and figures

### A regulatory RNA is involved in RNA duplex formation and biofilm regulation in

#### *Sulfolobus acidocaldarius*

Alvaro Orell, Vanessa Tripp, Victor Aliaga-Tobar, Sonja-Verena Albers, Vinicius Maracaja-Coutinho, Lennart Randau

**Table S1. Oligonucleotides used in this study**

| Primer no. | Sequence 5' to 3'                                                                            | description                                                                                                                 |
|------------|----------------------------------------------------------------------------------------------|-----------------------------------------------------------------------------------------------------------------------------|
| KO-R-OLfor | GGTGGTTCACATTATTTCTATAGGTCTATTTTTA<br>TTTG                                                   | Forward primer for upstream region $\Delta RrrR$ with <i>Apal</i> restriction site                                          |
| KO-R-for   | GATGTGCGACTATGAATCACTTAATAGTAGTCACT<br>TTAAC                                                 | Reverse primer for upstream region $\Delta RrrR$ , overlapping region                                                       |
| KO-R-rev   | GATGGATCCCTATTTATTTCTTAAAGAAATCAA<br>GTAAC                                                   | Forward primer for downstream region $\Delta RrrR$ , overlapping region                                                     |
| KO-R-OLrev | CACAAATAAAAATAGACCTATAGAAATAATGTGA<br>ACCACC                                                 | Reverse primer for downstream region $\Delta RrrR$ with <i>BamHI</i>                                                        |
| 558        | CTATTTTTACGTTCTAAACTAGTTTAAAAAGGGA<br>AAAAAGAAAAAATAACTTTGAGCAGTTCTAG                        | $\Delta saci0301$ forward for <i>pyrEF</i> exchange                                                                         |
| 559        | AACACACACCAGTTATATTCTGATAATGTATAAT<br>ATAACTTGGTGATTAAGACCGGCTATTTTTTCA<br>C                 | $\Delta saci0301$ reverse for <i>pyrEF</i> exchange                                                                         |
| 548        | CACTGTCCACAGCTCAATTC                                                                         | <i>saci0301</i> forward qPCR primer                                                                                         |
| 549        | CTTCCAGGCAATGGCCAGAC                                                                         | <i>saci0301</i> reverse qPCR primer                                                                                         |
| 560        | AAGGTGATGAAAGGATAAGGG                                                                        | <i>saci0567</i> forward qPCR primer                                                                                         |
| 561        | TTAGTAAGTGGTATAACTGTAGCTG                                                                    | <i>saci0567</i> reverse qPCR primer                                                                                         |
| 562        | CTGGTGAACAAACCGCTCAA                                                                         | <i>saci1357</i> forward qPCR primer                                                                                         |
| 563        | ACCGAGCCCACCTATATAGTAA                                                                       | <i>saci1357</i> reverse qPCR primer                                                                                         |
| 564        | AGTCTACAGCAAGGTCCAAAG                                                                        | <i>Saci0667</i> forward qPCR primer                                                                                         |
| 565        | ACTACTCCACTCGCAAGAAAG                                                                        | <i>Saci0667</i> reverse qPCR primer                                                                                         |
| 566        | CCTCCTGATAGCTTCTCTCCTA                                                                       | <i>Saci0688</i> forward qPCR primer                                                                                         |
| 567        | TGCAGTTAGGAAAGCAGTTAGA                                                                       | <i>Saci0688</i> reverse qPCR primer                                                                                         |
| 568        | CGACTTCATCGTGCTCATCTAT                                                                       | <i>Saci0906</i> forward qPCR primer                                                                                         |
| 569        | TGCATTGATGAGGCACTAGAC                                                                        | <i>Saci0906</i> reverse qPCR primer                                                                                         |
| 550        | GAAGGAGCAACAGCAGTCTG                                                                         | RrrR(+) forward qPCR primer                                                                                                 |
| 555        | AAATAAAAATGGTGGTTCAC                                                                         | RrrR(+) reverse qPCR primer                                                                                                 |
| 556        | TAAAAATAGACCTATATGGC                                                                         | RrrR(-) forward qPCR primer                                                                                                 |
| 599        | GTCCACCTGATTGTTGACC                                                                          | RrrR(-) reverse qPCR primer                                                                                                 |
| 552        | GTACCATGGATAAAAATAGACCTATATGGC                                                               | Forward primer for cloning RrrR(+) into pSVA1431 with <i>NcoI</i> restriction site                                          |
| 553        | GTACGGCCGATAGAGAATTCTATCCACGAC                                                               | Reverse primer for cloning RrrR(+) into pSVA1431 with <i>EagI</i> restriction site                                          |
| 606        | TTCTTCTTCTTTGCCATATAGGTCTATTTTTATTC<br>GGCCGGACAGACTTTATCACGCCCG                             | Forward primer for cloning RrrR(-) into pSVA1431 with <i>EagI</i> restriction site (inverse PCR)                            |
| 601        | GGAGCAACAGCAGTCTGGTCAACAATCAGGTG<br>GACCATGGTTAACTTAATCACG                                   | Reverse primer for cloning RrrR(-) into pSVA1431 with <i>NcoI</i> restriction site (inverse PCR)                            |
| 614        | GTACCGCGGAAAAAATTATCTTGAGTTAAAAAT<br>AAAAATGGTGGTTCACATTATTTCTTTTATGTAC<br>TCATTTCCAAATAGCTT | Forward primer for cloning RrrR(-) promoter sequence into pSVA1431(LacS reporter system) with <i>SacII</i> restriction site |

|           |                                                                                             |                                                                                                                                         |
|-----------|---------------------------------------------------------------------------------------------|-----------------------------------------------------------------------------------------------------------------------------------------|
| 615       | GTACCGCGGAAAAAATTATCTTGAGTTGGGGG<br>TGGGGGTGGTGGTTCACATTATTTCTTTTATGTA<br>CTCATTCCAAATAGCTT | Forward primer for cloning RrrR(-) mutated promoter sequence into pSVA1431(LacS reporter system) with <i>SacII</i> restriction site     |
| 616       | GTACCGCGGAATTTTTATGTGAGTATGGCTTAAT<br>AACTTGTTATTTACAAATAAAAATAATGTACTCA<br>TTTCCAAATAGCTT  | Forward primer for cloning RrrR(+) promoter sequence into pSVA1431(LacS reporter system) with <i>SacII</i> restriction site             |
| 617       | GTACCGCGGAATTTTTATGTGAGTATGGCGGGG<br>GGGCTTGTTATTTACAAATAAAAATAATGTACT<br>CATTCCAAATAGCTT   | Forward primer for cloning RrrR(+) mutated promoter sequence into pSVA1431(LacS reporter system) with <i>SacII</i> restriction site     |
| L7PRHAnew | AGCCAACGGCCGTTAGGCGTAGTCTGGAACAT<br>CGTAAGGGTAGTGCCTTAATGGCTTTAC                            | Reverse primer for cloning RrrR(+) and RrrR(-) promoter sequences into pSVA1431(LacS reporter system) with <i>EagI</i> restriction site |

**Table S2. Strains and plasmids used in this study**

| Strain/plasmid           | Genotype                                                                                                                                                                                                              | Source/reference     |
|--------------------------|-----------------------------------------------------------------------------------------------------------------------------------------------------------------------------------------------------------------------|----------------------|
| Strain                   |                                                                                                                                                                                                                       |                      |
| <i>E. coli</i>           |                                                                                                                                                                                                                       |                      |
| DH5 $\alpha$             | <i>Escherichia coli</i> K-12 cloning strain, F- $\Phi$ 80 <i>lacZ</i> $\Delta$ M15 $\Delta$ ( <i>lacZYA-argF</i> ) U169 <i>recA1 endA1 hsdR17</i> (rK-, mK+) <i>phoA supE44</i> $\lambda$ - <i>thi-1 gyrA96 relA1</i> | Gibco                |
| ER1821                   | F- <i>glnV44 e14-(McrA-)</i> <i>rfbD1 relA1 endA1 spoT1</i>                                                                                                                                                           | New England Biolabs  |
| <i>S. acidocaldarius</i> |                                                                                                                                                                                                                       |                      |
| MW001                    | Deletion of <i>pyrEF</i> (91-412 bp) in <i>S. acidocaldarius</i>                                                                                                                                                      | Wagner et al. (2012) |
| ACE100                   | Deletion of non-coding RNA RrrR in MW001                                                                                                                                                                              | this study           |
| ACE101                   | Deletion of <i>saci0301::pyrEF</i> in MW001                                                                                                                                                                           | this study           |
| ACE102                   | Deletion of <i>saci0301::pyrEF</i> in ACE100                                                                                                                                                                          | this study           |
| ACE103                   | MW001 carrying pACE113                                                                                                                                                                                                | this study           |
| ACE104                   | MW001 carrying pACE114                                                                                                                                                                                                | this study           |
| ACE105                   | MW001 carrying pACE115                                                                                                                                                                                                | this study           |
| ACE106                   | MW001 carrying pACE116                                                                                                                                                                                                | this study           |
| ACE107                   | ACE100 carrying pACE106                                                                                                                                                                                               | this study           |
| ACE108                   | ACE100 carrying pACE107                                                                                                                                                                                               | this study           |
| ACE109                   | MW001 carrying pACE106                                                                                                                                                                                                | this study           |
| ACE110                   | MW001 carrying pACE107                                                                                                                                                                                                | this study           |
| Plasmid                  |                                                                                                                                                                                                                       |                      |
| pSVA406                  | Gene targeting plasmid, pGEM-T Easy backbone, <i>pyrEF</i> cassette of <i>S. solfataricus</i>                                                                                                                         | Wagner et al. (2012) |
| pSVA1431                 | pRN1-based shuttle vector with maltose inducible promoter and <i>lacS</i> reporter gene of <i>S. solfataricus</i>                                                                                                     | Wagner et al. (2012) |
| pVT135                   | In-frame deletion of <i>RrrR</i> cloned into pSVA406 with <i>Apal</i> , <i>PstI</i>                                                                                                                                   | this study           |
| pACE106                  | <i>RrrR</i> sense strand cloned into pSVA1431 with <i>NcoI</i> , <i>EagI</i>                                                                                                                                          | this study           |
| pACE107                  | <i>RrrR</i> antisense strand cloned into pSVA1431 with <i>NcoI</i> , <i>EagI</i>                                                                                                                                      | this study           |
| pACE113                  | <i>RrrR</i> sense strand promoter sequence cloned into pSVA1431 with <i>SacII</i> , <i>EagI</i>                                                                                                                       | this study           |
| pACE114                  | <i>RrrR</i> antisense strand promoter sequence cloned into pSVA1431 with <i>SacII</i> , <i>EagI</i>                                                                                                                   | this study           |
| pACE115                  | <i>RrrR</i> sense strand mutated promoter sequence cloned into pSVA1431 with <i>SacII</i> , <i>EagI</i>                                                                                                               | this study           |
| pACE116                  | <i>RrrR</i> antisense strand mutated promoter sequence cloned into pSVA1431 with <i>SacII</i> , <i>EagI</i>                                                                                                           | this study           |

**Table S3. Differentially expressed ncRNAs.** Expression of identified ncRNAs in biofilm versus planktonic (B vs P) cells.

| ncRNA ID  | Genome coordinates |           | Length (nt) | RPKM       |         | B vs P (Log2) |
|-----------|--------------------|-----------|-------------|------------|---------|---------------|
|           | start              | end       |             | Planktonic | Biofilm |               |
| ncRNA_529 | 1,638,356          | 1,638,576 | 220         | 7          | 311     | 5.39          |
| ncRNA_332 | 1,042,083          | 1,042,172 | 89          | 23         | 187     | 2.94          |
| ncRNA_636 | 1,765,999          | 1,766,204 | 205         | 29         | 167     | 2.44          |
| ncRNA_322 | 995,929            | 996,022   | 93          | 14         | 53      | 1.83          |
| ncRNA_454 | 1,510,205          | 1,510,377 | 172         | 10         | 30      | 1.50          |
| ncRNA_742 | 1,900,049          | 1,900,241 | 192         | 10         | 30      | 1.50          |
| ncRNA_530 | 1,639,129          | 1,639,360 | 231         | 13         | 37      | 1.42          |
| ncRNA_792 | 2,010,283          | 2,010,091 | 192         | 13         | 37      | 1.42          |
| ncRNA_468 | 1,533,841          | 1,534,021 | 180         | 47         | 131     | 1.39          |
| ncRNA_668 | 1,800,041          | 1,800,283 | 242         | 23         | 61      | 1.32          |
| ncRNA_496 | 1,581,340          | 1,581,520 | 180         | 20         | 53      | 1.32          |
| ncRNA_664 | 1,797,848          | 1,798,017 | 169         | 10         | 26      | 1.29          |
| ncRNA_127 | 417,429            | 417,671   | 242         | 35         | 85      | 1.19          |
| ncRNA_239 | 805,730            | 805,902   | 172         | 428        | 1029    | 1.18          |
| ncRNA_634 | 1,764,515          | 1,764,604 | 89          | 19         | 45      | 1.16          |
| ncRNA_593 | 1,648,780          | 1,649,002 | 222         | 7          | 16      | 1.10          |
| ncRNA_317 | 972,593            | 972,683   | 90          | 11         | 25      | 1.10          |
| ncRNA_700 | 1,825,621          | 1,825,765 | 144         | 53         | 119     | 1.08          |
| ncRNA_533 | 1,643,581          | 1,643,819 | 238         | 17         | 38      | 1.07          |
| ncRNA_592 | 1,716,356          | 1,716,445 | 89          | 10         | 22      | 1.05          |
| ncRNA_61  | 248,056            | 248,275   | 219         | 30         | 64      | 1.01          |
| ncRNA_795 | 2,019,138          | 2,019,339 | 201         | 15         | 32      | 1.01          |
| ncRNA_319 | 986,262            | 986,440   | 178         | 29         | 15      | -1.04         |
| ncRNA_83  | 304,215            | 304,314   | 99          | 683        | 335     | -1.12         |
| ncRNA_804 | 2,032,119          | 2,032,246 | 127         | 66         | 30      | -1.23         |
| ncRNA_826 | 2,107,679          | 2,107,904 | 225         | 26         | 11      | -1.33         |
| ncRNA_91  | 331,519            | 331,631   | 112         | 104        | 44      | -1.33         |
| ncRNA_760 | 1,949,554          | 1,949,876 | 322         | 1127       | 441     | -1.44         |
| ncRNA_475 | 1,547,152          | 1,547,302 | 150         | 47         | 17      | -1.56         |

**Table S4. Biofilm volume quantitation.** Biofilm volumetric determinations were performed in three biological replicates and 9 images at different microscopy fields were recorded for each replicate. Biofilm volumes are expressed as  $\mu\text{m}^3 \cdot 10^6$ .

| Strain                                   | Biofilm volume ( $\mu\text{m}^3 \cdot 10^6$ ) | Biofilm thickness ( $\mu\text{m}$ ) | DAPI (%) | ConA (%) | IB4 (%) |
|------------------------------------------|-----------------------------------------------|-------------------------------------|----------|----------|---------|
| MW001                                    | 4.14 ± 0.57                                   | 71.9 ± 9.9                          | 57.7     | 23.1     | 19.2    |
| $\Delta\text{RrrR}$                      | 2.51 ± 0.22                                   | 43.6 ± 3.8                          | 44.0     | 35.5     | 20.5    |
| $\Delta\text{RrrR} + \text{p\_RrrR (+)}$ | 4.05 ± 0.52                                   | 70.3 ± 9.0                          | 54.7     | 28.6     | 16.7    |
| $\Delta\text{RrrR} + \text{p\_RrrR (-)}$ | 2.48 ± 0.29                                   | 43.0 ± 5.0                          | 41.8     | 39.8     | 18.4    |
| MW001 + p_RrrR (+)                       | 5.03 ± 0.41                                   | 87.3 ± 7.1                          | 26.0     | 58.4     | 15.6    |
| MW001 + p_RrrR (-)                       | 3.40 ± 0.36                                   | 59.0 ± 6.2                          | 46.0     | 33.9     | 20.1    |

**Table S5. *In silico* prediction of the potential target mRNAs of ncRNA RrrR.** The bioinformatics tool CopraRNA was used to identify RrrR-mRNA interactions. The ten highest-ranking hits are shown. Differential gene expression ratios (fold change (FC) or non-significant (n.s.)) are indicated for each potential target gene between biofilm-associated (B) cells and planktonic (P) cells.

| Rank | CopraRNA p-value | Locus    | Energy (kcal/mol) | Position mRNA | Position ncRNA | Annotation                                             | FC (B/P) |
|------|------------------|----------|-------------------|---------------|----------------|--------------------------------------------------------|----------|
| 1    | 4.03e-05         | saci0567 | -18.43            | 247-272       | 16-43          | Hypothetical protein                                   | 2.19     |
| 2    | 6.78e-04         | saci1357 | -16.92            | 350-382       | 19-45          | Nucleotide-binding protein, UspA family                | n.s      |
| 3    | 7.02e-04         | saci0765 | -13.45            | 217-229       | 27-39          | Predicted nucleotidyltransferase                       | n.s      |
| 4    | 8.64e-04         | saci0667 | -16.75            | 219-259       | 24-52          | HerA helicase                                          | n.s      |
| 5    | 9.03e-04         | saci0449 | -13.51            | 350-377       | 26-53          | Transcriptional regulator                              | 2.86     |
| 6    | 1.23e-03         | saci0688 | -18.82            | 266-291       | 26-48          | Ribosomal protein S12                                  | n.s      |
| 7    | 1.84e-03         | saci0906 | -17.51            | 244-267       | 17-41          | ATPase involved in DNA replication HolB, large subunit | n.s      |
| 8    | 1.90e-03         | saci2353 | -14.67            | 217-246       | 20-48          | Transcriptional regulator                              | n.s      |
| 9    | 1.23e-03         | saci0301 | -16.70            | 24-54         | 16-39          | Predicted membrane protein                             | 21.03    |
| 10   | 1.953e-03        | saci1430 | -15.06            | 358-370       | 26-38          | Valyl-tRNA synthetase                                  | n.s      |

**Figure S1**

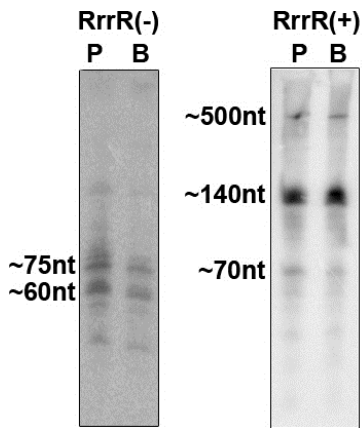

**Figure S1. Northern blot analysis of RrrR transcripts.** Small RNA molecules of *S. acidocaldarius* planktonic (P) or biofilm (B) cells were separated on denaturing polyacrylamide gels and hybridized with radioactively labeled probes complementary to the RrrR(-) or RrrR(+) duplex region.

**Figure S2**

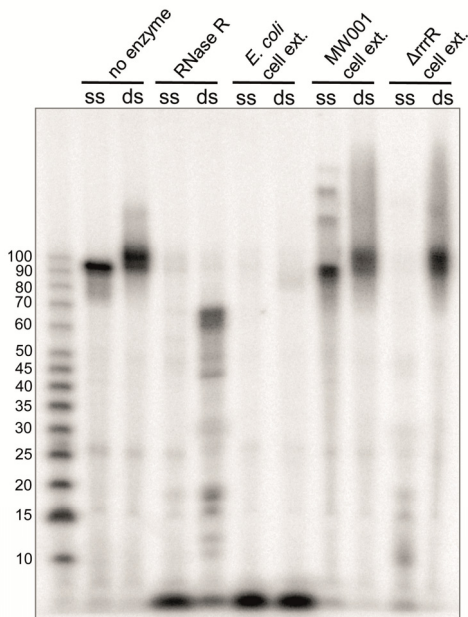

**Figure S2 RNaseR exonuclease.** (A) Radiolabeled single strand (ss) RrrR(+) and radiolabeled double-stranded (ds) RrrR were subjected to RNaseR digestion assays. 20U of RNaseR (Epicentre) or 5  $\mu$ g of total protein cell extract were added to the assays. Digestion products were visualized on a 10 % denaturing polyacrylamide gel. The sizes (in nucleotides) of the radiolabeled RNA ladder bands are indicated.

**Figure S3**

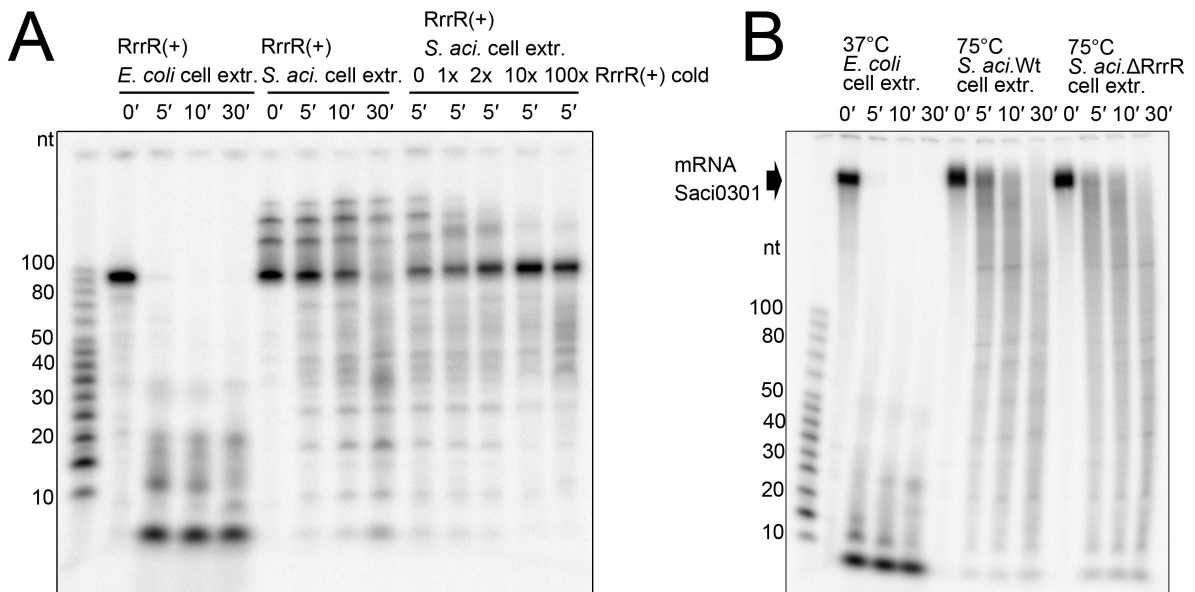

**Figure S3. RNA stability assays.** (A) Transcripts of radioactively labeled ssRrrR(+) were incubated with different cell extracts at 37°C (*E. coli*) or 75°C (*S. acidocaldarius*) for the indicated time. The addition of excess unlabeled RrrR(+) transcripts (molar ratio 1:1, 2:1, 10:1, 100:1) prevents ssRrrR degradation and upshift formation by RNA binding proteins (e.g. LSM proteins, see Figure S7). (B) Transcripts of radioactively labeled Saci0301 mRNA were incubated with different cell extracts at 37°C (*E. coli*) or 75°C (*S. acidocaldarius*) for the indicated time.

**Figure S4**

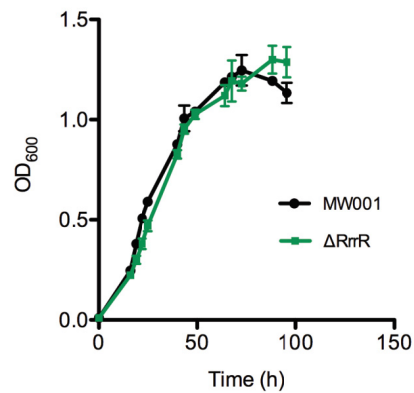

**Figure S4. Planktonic growth of the *S. acidocaldarius* RrrR deletion mutant strain ( $\Delta$ RrrR).** A shaking cultured RrrR deletion mutant strain was sampled at the indicated time points to measure cell density at OD<sub>600</sub>. Growth of the reference strain MW001 (black curve) and the markerless deletion mutant  $\Delta$ RrrR (green curve) was compared. Each point represents the mean of 3 biological replicates.

**Figure S5**

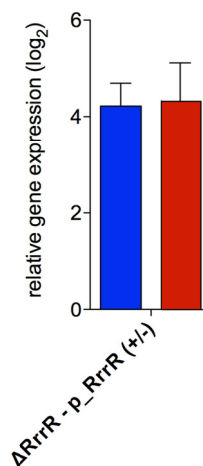

**Figure S5. Complementation of the  $\Delta$ RrrR deletion mutant.** Transcript levels of both RrrR(+) (blue bar) and RrrR(-) (red bar) were quantified by qRT-PCR after RNA isolation from the *S. acidocaldarius* RrrR deletion mutant strain ( $\Delta$ RrrR) overexpressing either RrrR(+) or RrrR(-). Total RNA was isolated from cells grown as biofilms. Relative transcript expression was normalized to the internal control gene *secY*. The means and standard deviations of 3 biological replicates are shown.

**Figure S6**

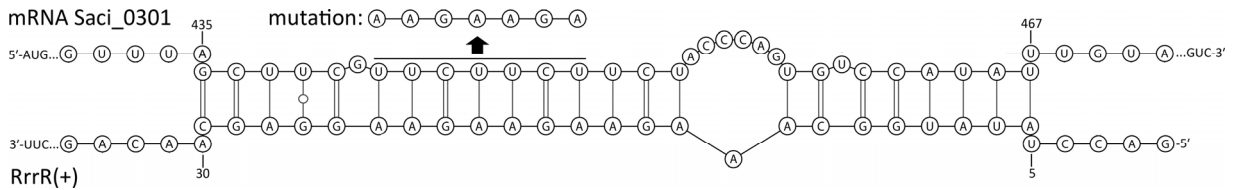

**Figure S6. Proposed interactions between RrrR(+) and the mRNA of Saci\_0301.** Potential mRNA targets for RrrR(+) were predicted *in silico* using the CopraRNA tool (34). The indicated seven nucleotide stretch was exchanged to assess duplex formation in the presence of recombinant LSm1/LSm2 proteins (Fig. 3B).

**Figure S7**

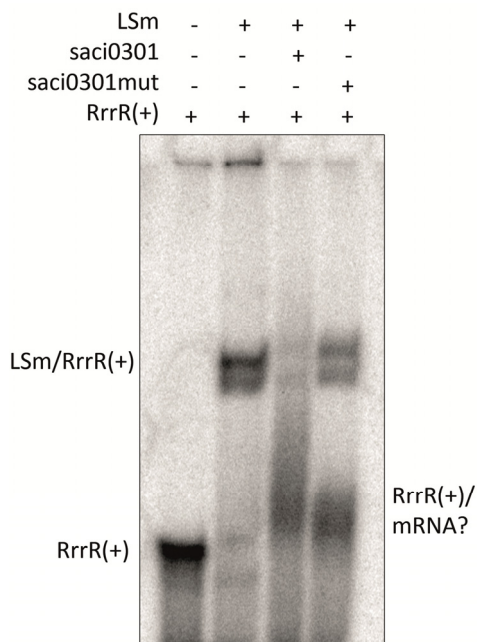

**Figure S7. LSm binding assays.** EMSAs demonstrate binding of RrrR(+) transcripts to 500 nM of recombinant LSm1-LSm2 complexes. A 2-fold excess of unlabeled saci0301 mRNA or a mRNA variant with a mutation of the predicted interaction region (mut, Fig. S4) was added to the reaction. A lower shift was observed for the native mRNA, suggesting that RrrR(+) – mRNA duplexes are formed. Reaction mixtures were separated by 8 % native PAGE.
